# Supplementary material for: The MD Anderson Prostate Cancer Patient-derived Xenograft Series (MDA PCa PDX) Captures the Molecular Landscape of Prostate Cancer and Facilitates Marker-driven Therapy Development
Source: Oxford University Press journal article supplement (doi:10.1158/1078-0432.ccr-20-0479), 2020-06-23
Supplement: 10780432ccr200479-sup-237017_3_supp_6351501_qbqr4r.docx [file 10780432ccr200479-sup-237017_3_supp_6351501_qbqr4r.docx]

| **Table S7. Rearrangements, amplifications, and deletions detected by array CGH** | | | | | | | | | | | | |
| --- | --- | --- | --- | --- | --- | --- | --- | --- | --- | --- | --- | --- |
| **PDX name** | **REARRANGEMENT** | | | | | **AMPLIFICATION** | | | **DELETION** | | | |
| **ERG** | **TMPRSS2** | **DSCAM** | **PRDM15** | **ETV1** | | **AR** | **MYC** | **PTEN** | **SPOP** | **SPOPL** | **TP53** |
| MDA PCa 43 |  |  |  |  |  | | Positive |  |  |  |  |  |
| MDA PCa 79 |  |  |  |  |  | |  |  | Deletion-he |  | Deletion-he |  |
| MDA PCa 86 | Positive | Positive |  |  |  | |  |  | Deletion-h/h |  |  |  |
| MDA PCa 91B | Positive |  | Positive |  |  | |  |  | Deletion-ho |  |  | Deletion |
| MDA PCa 94 |  |  |  |  |  | |  | Positive | Deletion-he |  |  |  |
| MDA PCa 100-C6 | Positive | Positive |  |  |  | |  |  |  |  |  |  |
| MDA PCa 101 | Positive | Positive |  |  |  | |  |  | Deletion-ho | Deletion-he | Deletion-he |  |
| MDA PCa 108 | Positive |  | Positive |  |  | |  |  | Deletion-ho |  |  |  |
| MDA PCa 112 |  |  |  |  |  | |  |  | Deletion-ho |  | Deletion-he |  |
| MDA PCa 115-C1 |  |  |  |  |  | |  | Positive | Deletion-h/h |  | Deletion-he |  |
| MDA PCa 137-13 | Positive | Positive |  |  |  | |  |  | Deletion-h/h |  |  |  |
| MDA PCa 144-4 | Positive | Positive |  |  |  | |  |  | Deletion-ho |  |  |  |
| MDA PCa 144-13 | Positive | Positive |  |  |  | |  |  | Deletion-ho |  |  |  |
| MDA PCa 146-10 |  | Positive | Positive |  |  | |  |  | Deletion-ho |  | Deletion-he |  |
| MDA PCa 146-12 |  | Positive | Positive |  |  | |  |  | Deletion-ho |  | Deletion-he |  |
| MDA PCa 146-20 |  | Positive | Positive |  |  | |  |  | Deletion-ho |  | Deletion-he |  |
| MDA PCa 149-1 | Positive | Positive |  |  |  | | Positive | Positive | Deletion-h/h |  |  |  |
| MDA PCa 150-1 |  |  |  |  |  | | Positive |  | Deletion-ho |  |  |  |
| MDA PCa 150-3 |  |  |  |  |  | | Positive |  | Deletion-ho |  |  |  |
| MDA PCa 152-1 |  |  |  |  |  | | Positive |  | Deletion-h/h |  |  |  |
| MDA PCa 153-7 | Positive | Positive |  |  |  | |  |  | Deletion-h/h |  |  |  |
| MDA PCa 153-14 |  |  |  |  |  | | Positive |  | Deletion-h/h |  |  |  |
| MDA PCa 160-29 | Positive | Positive |  |  |  | |  |  | Deletion-ho |  | Deletion-he |  |
| MDA PCa 166-1 |  |  |  |  |  | | Positive |  | Deletion-he |  |  |  |
| MDA PCa 170-4 |  |  |  |  | Positive | | Positive |  | Deletion-ho |  |  |  |
| MDA PCa 175-6 |  |  |  |  |  | |  | Positive |  |  |  |  |
| MDA PCa 177-B | Positive |  |  | Positive |  | |  |  | Deletion-he |  |  |  |
| MDA PCa 180-30 |  |  |  |  |  | | Positive |  |  |  |  |  |
| MDA PCa 183-A |  |  |  |  |  | |  |  | Deletion-he |  | Deletion-he |  |
| MDA PCa 188 |  |  |  |  |  | |  |  | Deletion-he |  |  |  |
| Discrepancies in ERG status exist between Table S2 and Table S7 because ERG status in Table S2 was obtained by IHC analyses, while ERG status in Table S7 was obtained by aCGH. In this case, ERG rearrangement was confirmed by the 3MB deletion between TMPRSS2 and ERG on chromosome 21q. Balanced copy number changes were observed if the ERG rearrangement was by insertion. Discrepancies due to differences in methods of evaluation were also observed for PTEN status because in Table S2 PTEN assay was done by FISH and in Table S7 by aCGH, where the copy number ratio was assessed with a control probe for chromosome 10 centromere. | | | | | | | | | | | | |
